# 1 Localization and phosphorylation in the Snf1 network is controlled by 2 two independent pathways

3 Niek Welkenhuysen<sup>1,2, †</sup>, Linnea Österberg<sup>1,2, †</sup>, Sebastian Persson<sup>2</sup>, Stefan  
4 Hohmann<sup>1</sup>, Marija Cvijovic<sup>2\*</sup>

5  
6 <sup>1</sup>Department of Biology and Biological Engineering, Chalmers University  
7 of Technology, Sweden

8 <sup>2</sup>Department of Mathematical Sciences, Chalmers University of Technology and University  
9 of Gothenburg, Sweden

10

11 †Authors contributed equally

12

13

14 \*Corresponding author:

15 Marija Cvijovic

16 Department of Mathematical Sciences,

17 Chalmers University of Technology and University of Gothenburg

18 SE-412 96 Gothenburg

19 Sweden

20

21 [marija.cvijovic@chalmers.se](mailto:marija.cvijovic@chalmers.se)

22 +46317725321

23

## 24 Abstract:

25

26 AMPK/SNF1 is the master regulator of energy homeostasis in eukaryotic cells and has a key  
27 role in glucose de-repression. If glucose becomes depleted, Snf1 is phosphorylated and  
28 activated. Activation of Snf1 is required but is not sufficient for mediating glucose de-  
29 re-pression indicating a second glucose-regulated step that adjusts the Snf1 pathway. To  
30 elucidate this regulation, we further explore the spatial dynamics of Snf1 and Mig1 and how  
31 they are controlled by concentrations of hexose sugars. We utilize fluorescence recovery after  
32 photobleaching (FRAP) to study the movement of Snf1 and how it responds to external glucose  
33 concentrations. We show that the Snf1 pathway reacts both to the presence and to the absolute  
34 concentration of glucose. Furthermore, we identify a negative feedback loop regulating Snf1  
35 activity. We also show that Mig1 localization correlates with the Snf1 phosphorylation pattern  
36 and not with the Mig1 phosphorylation pattern, suggesting that inactivation of Snf1 has a more  
37 pronounced effect on the localization of Mig1 than on the phosphorylation of Mig1. Our data  
38 offer insight into the true complexity of regulation of this central signaling pathway by one  
39 signal (glucose depletion) interpreted by the cell in different ways.

40

41

## 42 Introduction

43 AMPK and its yeast homolog SNF1 is the master regulator of energy homeostasis in eukaryotic  
44 cells (Hardie, 2014; Hardie et al., 2012). The AMPK/SNF1 family of protein kinases is  
45 regulated by multiple stimuli that signal an energy depletion or a significant rise in energy  
46 demand. In the yeast *Saccharomyces cerevisiae* the primary function of SNF1 is adaptation to  
47 glucose limitation when the use of alternative carbon sources is needed to achieve growth  
48 and proliferation (Hedbacker and Carlson, 2008). In addition, a broad spectrum of downstream  
49 effects, such as lipid biogenesis and gluconeogenesis, is affected by the SNF1 pathway to  
50 balance the energy demand and supply (Usaite et al., 2009; Zhang et al., 2010).

51  
52 The Snf1 kinase is constitutively activated by three upstream kinases Elm1, Sak1 and Tos3  
53 (García-Salcedo et al., 2014; Hong et al., 2003; Nath et al., 2003). When a high energy-yield  
54 sugar becomes available, such as the hexose sugars glucose, fructose or mannose, Snf1 is  
55 rapidly dephosphorylated by the PP1 phosphatase Reg1/2-Glc7, Sit4 or Ptc2 (Ruiz et al., 2013,  
56 2011; Zhang et al., 2011). The catalytic unit Snf1 alone is not sufficient to mediate glucose de-  
57 repression. For stable Snf1 activity, two more proteins need to bind Snf1 to form the  
58 heterotrimeric kinase complex SNF1 (Celenza et al., 1989; Schmidt and McCartney, 2000).  
59 The SNF1 complex consists of the catalytic alpha-subunit Snf1, regulatory gamma-subunit  
60 Snf4 and a beta-subunit, which can either be Gal83, Sip1 or Sip2 (Jiang and Carlson, 1997;  
61 Schmidt and McCartney, 2000). The binding of ADP to Snf4 protects from dephosphorylation  
62 and inactivation of Snf1 (Chandrashekarappa et al., 2013; Mayer et al., 2011). ATP competes  
63 with ADP for these binding sites, and this competition functions as an energy sensor (Mayer  
64 et al., 2011). The subcellular localization of the complex is regulated by the beta-subunits  
65 (Vincent et al., 2001). Localization studies of the three isoforms under high glucose conditions  
66 showed that all the beta-subunits seem to reside in the cytosol. With ethanol as the sole energy  
67 source, the Sip1 isoform is associated with the vacuolar membrane. Sip2 is located in the  
68 cytoplasmic, and Gal83 accumulates in the nucleus (Chandrashekarappa et al., 2016; Vincent  
69 et al., 2001). Under the shift from high glucose concentrations to ethanol as the sole carbon  
70 source, a major proportion of Snf1 and Snf4 localizes together with Gal83 to the nucleus  
71 (Vincent et al., 2001).

72  
73 Active Snf1 changes gene expression enabling the cell to employ alternative carbon sources  
74 (Gancedo, 1998). To alter gene transcription in the cell, Snf1 phosphorylates several  
75 transcription factors, among which Mig1 is the most prominent (Ostling and Ronne, 1998;  
76 Treitel et al., 1998). Mig1 in the unphosphorylated state represses genes required for the  
77 utilization of alternative carbon sources. Phosphorylated Mig1 relocates to the nucleus and  
78 interacts with Cyc8/Ssn6 and Tup1 to repress transcription of glucose repressed genes (Keleher  
79 et al., 1992; Treitel and Carlson, 1995). When the primary energy sources are depleted, Snf1  
80 phosphorylates Mig1 on at least four sites (DeVit and Johnston, 1999; Treitel et al., 1998). This  
81 leads to Mig1 exiting the nucleus (DeVit and Johnston, 1999). This relocation of Mig1 results  
82 in the alleviation of glucose repression and allows the expression of genes such as *SUC2* and  
83 *HXK1*, which are required for the use of alternative carbon sources (Carlson et al., 1981;  
84 Lutfiyya et al., 1998; Lutfiyya and Johnston, 1996; Treitel et al., 1998). Therefore, Mig1 is  
85 commonly used as a readout for the Snf1/Mig1 pathway. The dynamics of Mig1 relocation in  
86 response to different concentrations of hexoses has been studied before and is established as a  
87 measurement for the SNF1 pathway activity (Bendrioua et al., 2014; Schmidt et al., 2020;  
88 Welkenhuysen et al., 2017; Wollman et al., 2017). FRAP studies on Mig1 have shown  
89 nucleocytoplasmic shuttling, regardless of the external glucose concentrations (Bendrioua et  
90 al., 2014). The Mig1 protein pool follows a double exponential kinetic profile, indicating two  
91 different fractions of the protein pool that follow different kinetic patterns. The rates of the

92 protein pool depend on the glucose concentration (Bendrioua et al., 2014; Wollman et al.,  
93 2017).

94  
95 Activation of SNF1 is required but is not sufficient for mediating glucose de-repression.  
96 Overexpression of Sak1 or addition of sodium and lithium ions leads to activation of Snf1, but  
97 not to glucose de-repression (García-Salcedo et al., 2014; Ye et al., 2008). This indicates that  
98 a second glucose-regulated step governs the Snf1/Mig1 pathway activity (García-Salcedo et  
99 al., 2014). How Snf1 is regulated in this second step after activation is unknown. To better  
100 understand this regulatory step, we further explore the spatial dynamics of the Snf1 and Mig1  
101 and how they are controlled by concentrations of hexose sugars. We utilize fluorescence  
102 recovery after photobleaching (FRAP) to study the movement of Snf1 and how it responds to  
103 external glucose concentrations. We show that the Snf1 pathway reacts both to the presence as  
104 well as to the absolute concentration of glucose. We identify a negative feedback loop  
105 regulating Snf1 activity, as well as distinct kinetic behaviors in Snf1 nucleocytoplasmic  
106 shuttling that are dependent on both carbon source and concentration.

## 107 **Results**

### 108 **The kinetics of Snf1 nucleocytoplasmic shuttling is driven by carbon source availability**

109  
110 It is unclear how the Snf1 dynamic spatial distribution contributes to Snf1's role in the glucose  
111 derepressing pathway. To further understand how Snf1 mechanistically regulates energy  
112 balance in the cell, we employed fluorescence recovery after photobleaching (FRAP).  
113 Exponentially grown yeast cells with a Snf1-GFP construct were exposed to YNB under three  
114 different conditions: 2% glucose, 0.05% glucose or 2% glycerol for at least 1.5 h before the  
115 onset of the experiment. The fluorescent Snf1 in the nucleus is bleached, and the subsequent  
116 recovery of fluorescence in the nucleus is observed. The FRAP data were analyzed with a non-  
117 linear mixed effect framework (NLME), assuming both a single (Figure 1) and a double (SI  
118 data files 2, 3 and 4) exponential model. Non-linear mixed-effects modelling is typically used  
119 for longitudinal data exhibiting both within and between-subject variability (Davidian and  
120 Giltinan, 2003). This method has been widely used in pharmacokinetics and pharmacodynamic  
121 studies (Lavielle and Mentré, 2007; Sissoko et al., 2016), but in recent years it is exploited in  
122 single-cell time-lapse data facilitating our understanding of cell-to-cell variability (Almquist et  
123 al., 2015; Llamasi et al., 2016; Welkenhuysen et al., 2017; Persson et al., 2020). When  
124 analyzing fluorescence measurements of a tagged protein in single cells over time, the observed  
125 intensity will differ between measurements even if the cells are in a steady-state due to the  
126 measurement error. Moreover, owing to extrinsic variability, cells will have different intensity  
127 levels. Using a mixed-effects framework, the observed cell-to-cell variability can be accounted  
128 for in the analysis by letting the rate parameters vary between cells according to a probability  
129 distribution. Furthermore, a mixed-effects framework allows the assessment of potential  
130 correlations between parameters in different cells.

131  
132 Both single and double models were able to describe the data well. However, the Fisher  
133 matrix indicates overfitting when using the double exponential equation (summary statistics  
134 in SI data files 2, 3 and 4 and complete results at  
135 [https://github.com/cvijoviclab/Mig1\\_frap\\_nlme](https://github.com/cvijoviclab/Mig1_frap_nlme)). The single exponential fit performed best  
136 for all conditions (Figure 1A). The 0.05% glucose showed slightly inconsistent behavior with  
137 a single exponential curve, but the analysis of the model diagnostics shows that a single-  
138 exponential model gives a good approximation of the kinetic behavior.

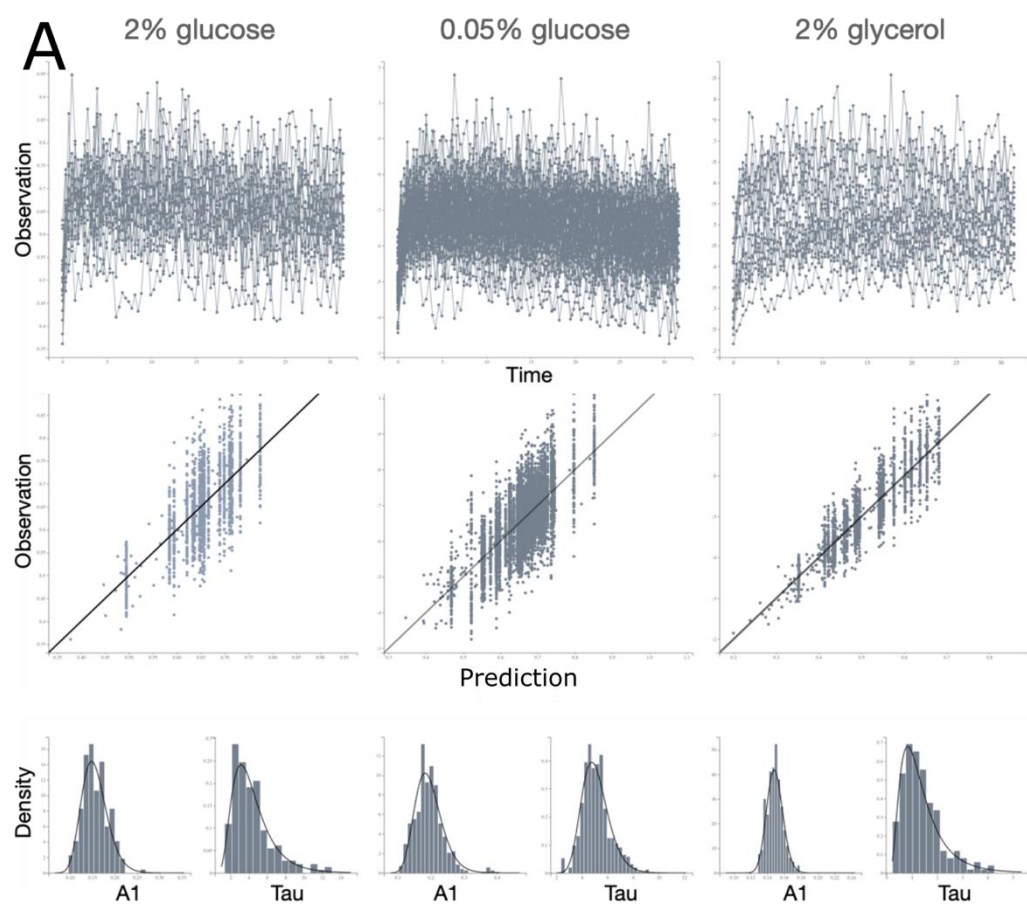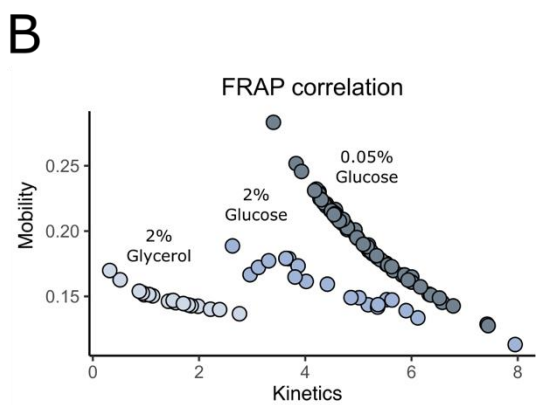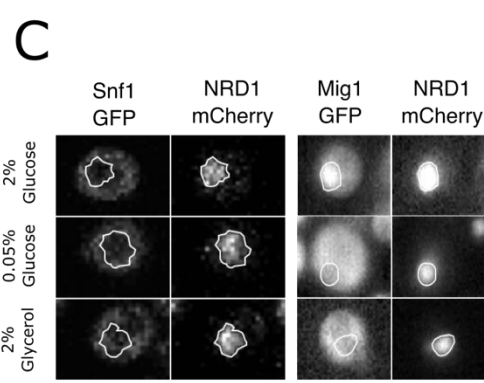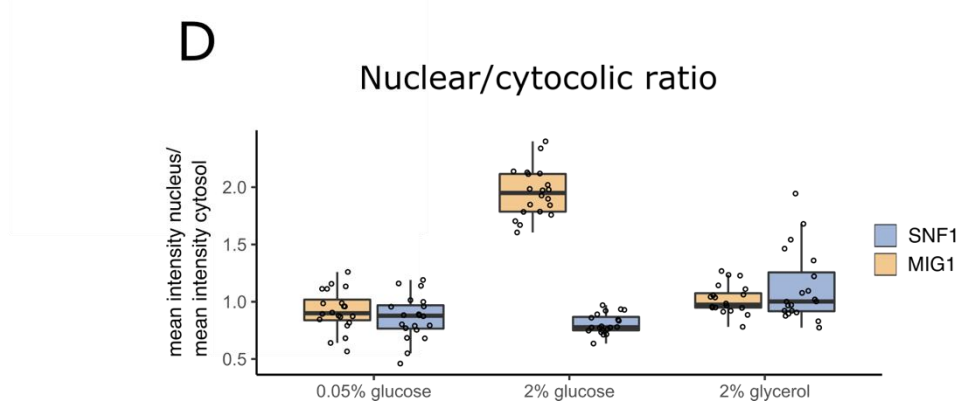

139  
140  
141

142

143 **Figure 1:** FRAP (Snf1) and nuclear localization (Snf1 and Mig1) measurements of  
 144 exponentially grown cells exposed to YNB with either 2% glucose, 0.05% glucose or 2%  
 145 glycerol. (A) the single-cell recovery curves from the FRAP experiment, individual prediction  
 146 versus observation (IPRED) plot based on the single exponential fit ( $I = I_0 + A1 * (1 - e^{-tau1*t})$ ,  $I_0$  represents the degree of bleaching), and the resulting marginal density plots  
 147 for both the individual parameters (bar) and population distributions (line) for the parameters  
 148  $A1$  (the mobility constant) and  $tau1$  (the kinetic constant). (B) the correlation between the  
 149 individual parameters. (C) Snf1-GFP and Mig1-GFP fluorescence relative to the nuclear  
 150 marker Nrd1-mCherry. The nuclear-to-cytosolic ratio (NC ratio) was calculated by dividing  
 151 the mean of the fluorescence in the nucleus with the mean of the fluorescence in the cytosol.  
 152 (D) single-cell nuclear-to-cytoplasmic ratio of Snf1 and Mig1.

154

155 The fluorescently tagged Snf1 was significantly bleached during the FRAP experiment, and  
 156 the nuclear fractions differ between conditions, hence the mobility (parameter  $A1$ ) did not  
 157 accurately reflect the mobile fraction. To correct for the bleached population, we used the  
 158 steady-state value of the nuclear fraction and the estimated degree of bleaching in each  
 159 condition ( $I_0$ ) to calculate the mobile and immobile fractions of Snf1 (Table 1). The Snf1  
 160 steady-state nuclear fractions were similar in high and low glucose (Figure 1D), the mean fold  
 161 change of 1.06 when comparing 0.05% glucose to 2% glucose, were not significant (p-value =  
 162 0.5479). At 2% glycerol the mean NC ratio was increased with a fold change of 1.39 relative  
 163 2% glucose (p-value = 1e-05) and 1.30 compared to 0.05% glucose (p-value = 0.0072). The  
 164 localization of Snf1 seems to be more sensitive to the type of carbon source than the level of  
 165 glucose which is clear when measuring the nuclear localization of the Snf1 target Mig1. Mig1  
 166 has a 2.20-fold decrease when comparing the mean NC ratio of 0.05% to 2% glucose (p-value  
 167 = 4.4e-11) and a 1.98-fold decrease when comparing 2% glycerol to 2% glucose (p-value =  
 168 4.4e-11). There was no significant difference of Mig1 nuclear localization between 0.05%  
 169 glucose and 2% glycerol (p-value = 0.23). This indicates that Snf1 nuclear localization is  
 170 primarily controlled by carbon source, that the relative difference in glucose concentration has  
 171 a smaller effect than the carbon source itself compared to its target Mig1. Unlike Snf1, Mig1  
 172 nuclear localization is more affected by a change in glucose level than the change to a less  
 173 favorable carbon source. This is also reflected in the kinetic coefficient for Snf1 where the cells  
 174 grown in glucose show a fast nuclear-cytoplasmic shuttling, in contrast to the cells grown in  
 175 glycerol showing a slow nuclear-cytoplasmic shuttling (Table 1).

176

177

178 **Table 1:** FRAP population parameters for Snf1 separated by the fixed effects and standard  
 179 deviation of random effects (W). Correlation between the kinetic constant ( $tau1$ ) and mobility  
 180 ( $A1$ ), the degree of bleaching ( $I_0$ ) as well as steady-state data and calculated fractions.

|            | 2% glucose   |        | 0.05% glucose |         | 2% glycerol   |        |
|------------|--------------|--------|---------------|---------|---------------|--------|
|            | $Y_p$        | S.E    | $Y_p$         | S.E     | $Y_p$         | S.E    |
| $A1$       | <b>0.153</b> | 0.0177 | <b>0.191</b>  | 0.00804 | <b>0.149</b>  | 0.0157 |
| $tau1$     | <b>3.93</b>  | 0.961  | <b>4.98</b>   | 0.18    | <b>1.18</b>   | 0.221  |
| $I_0$      | <b>0.501</b> | 0.0201 | <b>0.464</b>  | 0.00839 | <b>0.358</b>  | 0.0245 |
| $W_{A1}$   | <b>0.184</b> | 0.108  | <b>0.209</b>  | 0.0252  | <b>0.0642</b> | 0.0464 |
| $W_{tau1}$ | <b>0.471</b> | 0.22   | <b>0.207</b>  | 0.0255  | <b>0.592</b>  | 0.139  |
| $W_{I_0}$  | <b>0.104</b> | 0.0205 | <b>0.108</b>  | 0.011   | <b>0.25</b>   | 0.0406 |



|                   |               |         |               |         |               |         |
|-------------------|---------------|---------|---------------|---------|---------------|---------|
| corr A1-tau1      | <b>-0.715</b> | 0.432   | <b>-0.998</b> | 0.00175 | <b>-0.917</b> | 0.322   |
| $I_{nuc}/I_{cyt}$ | <b>0.813</b>  | 0.00424 | <b>0.856</b>  | 0.00494 | <b>1.117</b>  | 0.00580 |
| Mobile fraction   | <b>0.897</b>  |         | <b>0.9224</b> |         | <b>0.872</b>  |         |
| Immobile fraction | <b>0.103</b>  |         | <b>0.0776</b> |         | <b>0.128</b>  |         |

181

182

183 The NLME regression approach provides information about cell-to-cell variability and the  
 184 correlation between population parameters. We observed a strong negative correlation between  
 185 mobility and the kinetic coefficient (Table 1 and Figure 1B), where cells with a high mobile  
 186 fraction show a slower kinetic behavior. The opposite relationship was observed between  
 187 conditions (Figure 1B), where cells grown in 0.05% glucose, with an overall higher mobile  
 188 fraction, have a general faster kinetic behavior. In this aspect, the carbon source seems to have  
 189 a different role than the glucose concentration since the immobile fraction decreases with  
 190 decreasing glucose levels but increases with a less favorable carbon source.

191

192

### 193 **Snf1 phosphorylation status correlates with Mig1 localization but not with the** 194 **phosphorylation status**

195

196 The FRAP experiments showed that Snf1 localization and nucleocytoplasmic shuttling  
 197 parameters show a larger difference depending on the type of carbon source than on the energy  
 198 levels. We set out to find if this relationship is also present in the phosphorylation pattern of  
 199 Snf1 and Mig1. Samples were taken three minutes after a carbon-source concentration change  
 200 and analyzed by Western blot. The concentration shift was performed from ethanol as carbon  
 201 source to a glucose concentration of 0%, 0.05%, 0.2%, 0.5%, 1%, and 4%. Dephosphorylation  
 202 of Snf1 is measured with an antibody that recognizes the phosphorylated form of Snf1 (see  
 203 Material and Methods). A change in phosphorylation status occurred at all glucose  
 204 concentrations upshifts. A significant difference (paired student t-test  $p < 0.001$ ) between the  
 205 0% and 0.05% and 1% was observed (Figure 2A and Figure S1A). This suggests that the bulk  
 206 of Snf1 protein in the cell is dephosphorylated as soon glucose is taken up by the cell.  
 207 Phosphorylated Mig1 has a different migration pattern than non-phosphorylated Mig1 and,  
 208 therefore, can be separated through Western blot. In a lower glucose concentration, Mig1  
 209 shows the same migration pattern as at the 0% glucose (Figure 2B and Figure S1B). Only at  
 210 concentrations higher than 0.5%, a non-phosphorylated species is observed. The significant  
 211 difference between 0% and 0.05% compared to the upshift to 4% was confirmed with a paired  
 212 student t-test with a p-value of  $p < 0.015$  for 0% and  $p < 0.005$  for 0.05%.

213

214 The initial short-term phosphorylation status of Snf1 and Mig1 showed a considerable  
 215 difference. Snf1 is dephosphorylated as soon as the cell is exposed to 0.05% glucose, while  
 216 dephosphorylated Mig1 can only be observed at concentrations higher than 0.5%. As the Mig1  
 217 nuclear localization is used as a measurement for SNF1 pathway activity, we monitored the  
 218 nuclear localization of Mig1 to determine if it correlates with the Snf1 or Mig1 phosphorylation  
 219 pattern. Mig1 readily localized to the nucleus after exposure to both low and high concentration  
 220 of glucose (Figure 2C, Figure S1C).

221  
222  
223  
224  
225  
226  
227  
228  
229  
230  
231  
232  
233  
234  
235

Next, we studied the expression of genes under the conditions tested above. As a measure for *HXK1* and *SUC2* gene expression, we utilized a plasmid expressing rapidly degradable YFP from either the *HXK1* or *SUC2* promoter (Schmidt et al., 2020). We only observed an expression from the *HXK1* and *SUC2* promoter at 0.05% glucose, while no notable increase in expression was observed at 0% and 4% glucose (Figure 2D). The nuclear Mig1 observed at 0.05% is only temporary; after an initial nuclear localization, the nuclear signal of Mig1 declines (SI Figure 1).

Overall, we show that in cells exposed to 0% glucose, Snf1 and Mig1 are initially phosphorylated, and Mig1 resides in the cytosol. At 0.05% glucose Snf1 becomes dephosphorylated, while Mig1 remains phosphorylated but partially enters the nucleus. Finally, at 4% glucose, both Mig1 and Snf1 are in the non-phosphorylated form, and Mig1 is in the nucleus (Figure 2).

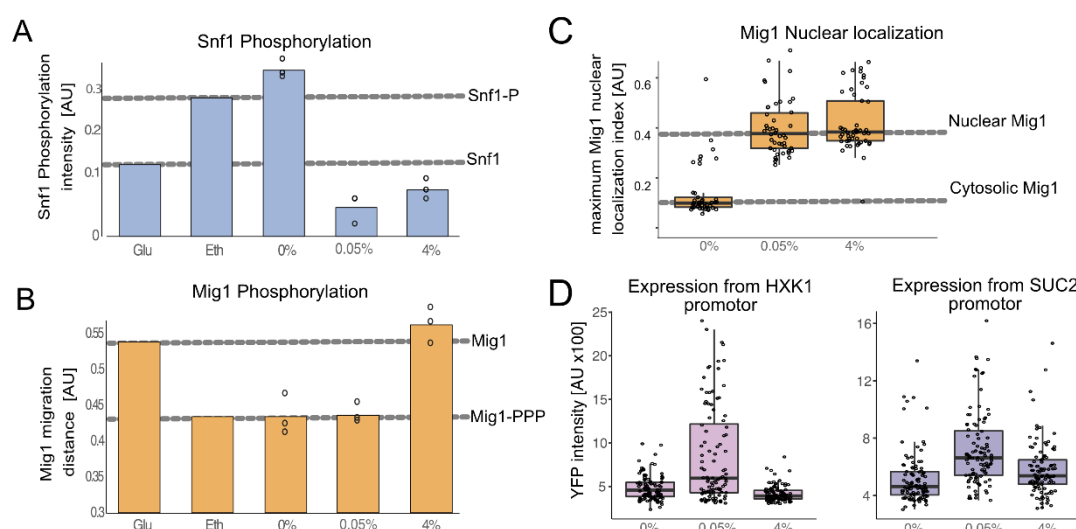

236  
237 **Figure 2:** Cells were exposed to upshift (3 min) to higher glucose concentrations (0%, 0.05%  
238 and 4%). Glucose and ethanol represent Snf1 phosphorylation intensity in steady-state  
239 conditions. (A) Snf1 phosphorylation and (B) Mig1 phosphorylation as measured by Western  
240 blot from three independent experiments. The horizontal dotted gray lines represent the  
241 intensity in the steady-state conditions. (C) the maximum Mig1 nuclear localization in wild  
242 type cells within 15 minutes after the shift from ethanol to the indicated glucose concentration  
243 (0%, 0.05% and 4%). The horizontal dotted gray lines represent the localization index  
244 indicating (bulk) Mig1 located in the nucleus or cytosol. (D) the level of expression from the  
245 *HXK1* and *SUC2* promoters. Fluorescence intensity of YFP expressed through the *HXK1* or  
246 *SUC2* promoter after two hours shift to 0%, 0.05% and 4%.

247  
248 **The short-term Mig1 response is more sensitive to glucose than to fructose and mannose**

249  
250 To better understand the sensitivity of the initial Snf1/Mig1 pathway response towards different  
251 carbon source levels, cells were exposed to glucose, mannose and fructose. Through  
252 fluorescent time-lapse microscopy, the initial spatial response of Mig1 was observed. We  
253 exposed cells to concentration shifts from ethanol to 0%, 0.005, 0.05%, 0.5%, 1%, and 4%  
254 glucose, mannose or fructose. Mig1 localizing to the nucleus has been observed at 0.005%  
255 glucose. While in upshift to mannose and fructose (Figure 3 and Figure S2), Mig1 nuclear

256 localization was only observed at concentrations above 0.05%. These results suggest that the  
257 Mig1 nuclear import is more sensitive to glucose than to mannose and fructose. For the upshift  
258 to mannose, the maximum nuclear intensity was already reached at the upshift to 0.05%  
259 glucose, and the average nuclear intensity did not increase more. Glucose reaches a maximum  
260 Mig1 nuclear intensity at a lower concentration compared to fructose. This could be a  
261 consequence of the import rates of these hexose sugars since the maximum import rate of  
262 glucose is lower than the import rate of fructose (Berthels et al., 2008). Altogether, this suggests  
263 that the nuclear import rate of Mig1 is coupled to the import of Mig1 in the cell or the  
264 availability of the hexose sugars inside the cell. Overall, for all hexoses, the Mig1 nuclear  
265 intensity increased in a dose-dependent manner, with the rate of increase being hexose specific.  
266

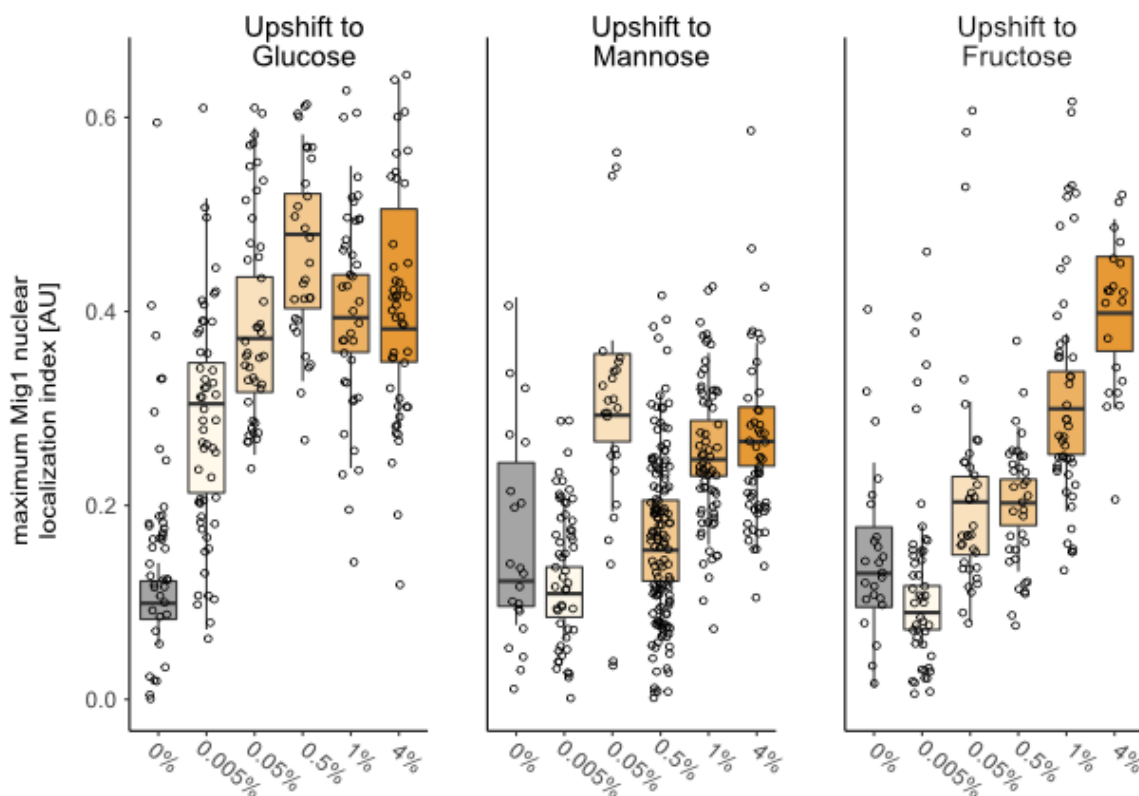

267  
268 **Figure 3:** Mig1 nuclear localization in cells after the shift from ethanol to the indicated  
269 concentration of glucose, mannose or fructose. Mig1 localization within the observation time  
270 of 15 minutes. Each circle represents the maximum Mig1 localization for one cell. Horizontal  
271 lines indicate the mean, the boxplot has as lower and upper hinge respectively the 25<sup>th</sup> and 75<sup>th</sup>  
272 percentile and the whiskers denote the 95% confidence interval. The horizontal dotted gray  
273 lines represent either localization index which indicates (bulk) Mig1 located in the nucleus, or  
274 cytosol.

## 275 **Materials & Methods**

### 276 **Strains and plasmids**

277 Yeast strains were grown at 30°C in YNB synthetic complete medium containing 1.7 g/l yeast  
278 nitrogen base, 5 g/l ammonium sulfate, 670 mg/l complete supplement mix with appropriate  
279 drop out where applicable; supplemented with carbon source as indicated by the specific  
280 experiments.

281



282 **Strains used in this study:**

283 BY4741 *MATa his3Δ1 leu2Δ0 met15Δ0 ura3Δ0*

284 BY4741 *MATa his3Δ1 leu2Δ0 met15Δ0 ura3Δ0 SNF1-GFP-HIS3MX NRD1-mCherry-Hph*

285 BY4741 *MATa his3Δ1 leu2Δ0 met15Δ0 ura3Δ0 ΔMig1::kanMX*

286 W303-1A (202) *MATa {leu2-3,112 trp1-1 can1-100 ura3-1 ade2-1 his3-11,15}*

287 W303-1A (202) *MATa {leu2-3,112 trp1-1 can1-100 ura3-1 ade2-1 his3-11,15} NRD1-*

288 *mCherry- Hph MIG1-GFP-KanMX*

289 W303-1A (202) *MATa {leu2-3,112 trp1-1 can1-100 ura3-1 ade2-1 his3-11,15 Δ Snf1::KanM*

290

291 **Plasmids used in this study:**

292 Mig1-HA *URA3* pRS316 (Schmidt et al., 2020)

293 Snf1-HA *URA3* pMR2307 (McCartney and Schmidt, 2001)

294 *HXK1p-Citrine(A206K)* BamHIlinker *ADH1tail-ACT1t* (Schmidt et al., 2020)

295 *SUC2p-Citrine(A206K)* BamHIlinker *ADH1tail-ACT1t* (Schmidt et al., 2020)

296

297

298 **Fluorescent Recovery After Photobleaching (FRAP)**

299

300 BY4741 and BY4741 *SNF1-GFP-HIS3MX NRD1-mCherry-Hph* were grown in YNB to  
301 exponential phase,  $OD \approx 0.3$ , and immobilized on an 8-well Chambered Coverglass (Ibidi)  
302 coated with poly-L-lysine (Sigma). Media was switched to YNB supplemented with Complete  
303 Supplement Mix (Formedium) with either 2% glucose, 0.05% glucose or 2% glycerol at least  
304 1h before imaging to ensure adaptation to the new carbon source. At least 20 cells per condition  
305 were imaged on ELYRA PS.1 SIM/PAL-M LSM780 (Zeiss) using Plan-Apochromat 40x /1.4  
306 oil immersion objective, with settings: 1.59 Airy which equals  $1.1 \mu\text{m}$  z sectioning, 6X zoom  
307 with pixel size of  $0.28 \mu\text{m}$  and pixel dwell time of 6.14 sec. The cells were continuously imaged  
308 for 100 frames, and bleaching was done in 20 bursts at 25% after 10 pre-scans using a circular  
309 ROI, of 6 pixels in diameter covering the nucleus.

310

311 **Image processing:** The average fluorescent intensity was extracted from the time-lapse image  
312 series as well as the time index for each image using the ZEN software (Zeiss). Given the  
313 values for background intensity, the intensity for the nuclear region, as well as a control region  
314 containing adjacent cells in the same frame, background removal and bleaching correction was  
315 done in RStudio (RStudio Team, 2020), Version 1.4.1106, and the intensities were normalized  
316 based on the pre-scans.

317

318 **Non-linear mixed effect model:** A non-linear mixed-effect regression method for analyzing  
319 FRAP data was implemented and simulated in Monolix (version 2020R1, Antony, France:  
320 Lixoft SAS, 2021 (Kuhn and Lavielle, 2005)). The data, project files and models are  
321 available at github repository: [https://github.com/cvijoviclab/Mig1\\_frap\\_nlme](https://github.com/cvijoviclab/Mig1_frap_nlme).

322

323 We used both a double exponential and a single exponential function to fit the data:

324

325 Single exponential:  $I = I_0 + A1 * (1 - e^{-\tau_1 t})$

326 Double exponential:  $I = I_0 + A1 * (1 - e^{-\tau_1 t}) + A2 * (1 - e^{-\tau_2 t})$ ,

327

328 where  $I_0$  represent the degree of bleaching,  $A1$  is the mobility constant, and  $\tau_1$  the kinetic  
329 constant.

330

331 When bleaching the nucleus, a substantial proportion of the fluorescent protein pool is

332 bleached, affecting the calculations of the immobile fraction. To correct for this, the area of the  
333 nucleus and the cell was extracted from 20 cells in 0.05% glucose with Fiji software  
334 (Schindelin et al., 2012). This was used to calculate cell and nuclear volumes that were assumed  
335 to have a spherical shape. The nuclear to cytosolic ratio was calculated based on 20 cells in  
336 respective conditions using Fiji for extracting average intensities and R to calculate the ratios  
337 by creating a bleaching curve, apply correction and perform linear regression on the time series  
338 data. The bleached volume is 2.438379  $\mu\text{m}^3$  and covers the nucleus and assuming Snf1 is  
339 mostly vacuole excluded (Chan and Marshall, 2014), 8.32% of the cytosol. The immobile  
340 fraction derived from the fitted model was then recalculated, accounting for the proportion of  
341 the bleached protein pool.

342

### 343 **Steady-state localization microscopy**

344 BY4741 and BY4741 *SNF1-GFP-HIS3MX NRD1-mCherry-Hph* were grown in YNB  
345 (Formedium) at 30°C into exponential phase and immobilized on an 8-well Chambered  
346 Coverglass (Ibidi) coated with poly-L-lysine (Sigma). Media was switched to YNB with either  
347 2% glucose, 0.05% glucose or 2% glycerol at least 1h before imaging to ensure adaptation to  
348 the new carbon source. At least 20 cells/condition were imaged on either ELYRA PS.1  
349 SIM/PAL-M LSM780 (Zeiss) using Plan-Apochromat 40x /1.4 oil immersion objective or  
350 DMi8 (Leica) with Lumencor SOLA SE led light (Lumencor) and Leica DFC9000 GT sCMOS  
351 camera using HCX PL APO 40x/1.3 oil immersion objective.

352

353 **Image processing:** Cell segmentation, extraction of mean intensities and background removal  
354 was done in Fiji software and MATLAB \_R2019b. Plots and statistical analysis was done using  
355 RStudio, Version 1.4.1106.

356

357 **Statistics:** As the dataset did not pass the Shapiro–Wilk test, a non-parametric equivalent of  
358 ANOVA was used, the Kruskal-Wallis test. For pairwise comparison, a Wilcox test with  
359 Bonferroni correction was performed. These statistical tests were done in RStudio, Version  
360 1.4.1106.

361

### 362 **Short-timescale microfluidics experiments**

363 The yeast strains were transformed with GFP-KanMX and mCherry hphNT1 using standard  
364 methods for yeast genetics and transformation (Daniel Gietz and Woods, 2002). Yeast strains  
365 were grown to mid-log phase at 30°C in YNB synthetic complete medium containing 1.7 g/l  
366 yeast nitrogen base, 5 g/l ammonium sulfate, 670 mg/l complete supplement mix; 10 mg/l  
367 adenine and supplied with 540 mM ethanol overnight. A glass-bottom petri dish (GWST-5030,  
368 WillCo Wells, UK) was treated with concanavalin A solution (1 mg/ml in 10mM TrisHCl-  
369 buffer, 100mM NaCl, adjusted to pH 8.0 using 5 M HCl) for 30 min at room temperature. The  
370 concanavalin A solution was removed, and the cell suspension was added and incubated for 5  
371 min at 30°C. Cells which did not adhere to the surface were removed by washing with YNB.  
372 Exposure of cells to different media conditions was performed using a BioPen system (Fluicell  
373 AB, Sweden). Experiments were performed on an inverted microscope Olympus cellR  
374 widefield microscope system, based on an inverted IX81 motorized microscope with a Xe light  
375 source (MT20) and a Hamamatsu C8484 CCD camera. Images were acquired using a U PlanS  
376 Apo 40x NA 0.95l objective. The filter cubes, light intensities and exposure time and light  
377 intensities for all imaging channels used were as following for GFP: excitation 472/30nm  
378 emission 520/35nm with an intensity of 20% for 350 ms. mCherry: excitation 560/40 nm,  
379 emission 630/75 nm with an intensity of 20% for 150 ms. The microscope and the microfluidic  
380 device were controlled using the Experiment Manager in the Xcellence software. The

381 temperature was set to 30°C. Three images with an axial distance of 0.8 μm were acquired in  
382 transmission and fluorescent channels. The acquisition time for one set of images at each time  
383 point was ≈15 s. Images were acquired at changing imaging intervals to reduce phototoxicity  
384 and bleaching while keeping appropriate timing to monitor changes in Mig1 localization.  
385 Time-lapse imaging was performed 3 times every 30 s until the media shift, followed by 15  
386 times every 20 s, followed by 5 times every 120 s, adding up to an overall experiment time of  
387 16 min. Brightfield images acquired above the focal plane were divided by images acquired  
388 below the focal plane using custom Matlab scripts. Division of images leads to the elimination  
389 of uneven illumination and enhances the diffraction pattern of cells. Segmentation was  
390 performed on the resulting images using CellX (Mayer et al., 2013). The Mig1-localization  
391 index was calculated from the CellX output as follows:

392

393 
$$\text{Localization index} = (\text{Median fluorescence}_{\text{nuc}} / \text{Median fluorescence}_{\text{cell}}) - 1$$

394

395 Cells were tracked using custom MATLAB scripts using previously described methods  
396 (Riccova et al., 2013).

397

### 398 **Western Blot analysis**

399 **Mig1 downshifts:** BY4741 with *mig1Δ* was transformed with a Mig1-HA plasmid. Yeast  
400 strains were grown to mid-log phase at 30°C in YNB, with 4% glucose, BY4741 was used as  
401 control. 5 minutes after the switch of media containing glucose or fructose in concentrations  
402 ranging between 0.28 mM to 220 mM, respectively 0,005% to 4%, the cells were harvested  
403 through incubation in 2M NaOH and subsequent incubation in 50% trichloroacetic acid.

404

405 **Snf1 and Mig1 upshifts:** *Snf1Δ* was transformed with the centromeric plasmid pSnf1-HA, and  
406 *mig1Δ* was transformed with the centromeric plasmid pMIG1-HA. Cells were grown to mid-  
407 log phase at 30°C in YNB; 10 mg/l adenine and 540 mM ethanol overnight. The cells were  
408 switched to YNB containing a final concentration of glucose, fructose or mannose ranging  
409 between 0.28 mM to 220 mM, respectively 0,005% to 4%. 5 minutes after the switch, cells  
410 were harvested through incubation in 2M NaOH and subsequent incubation in 50%  
411 trichloroacetic acid.

412

413 Cells were harvested by centrifugation, and 50 μg of protein were applied to gel electrophoresis  
414 as previously described (Bendrioua et al., 2014). The protein concentration was determined by  
415 the DC protein assay kit (Bio-Rad, Hercules). Proteins were detected using rabbit anti-  
416 phospho-Snf1 (1:1000, Santa Cruz Biotech) and mouse anti-HA (1:2000, Cell signaling  
417 technology) or (F-7)(1:1000, Santa Cruz Biotech) antibodies. Primary antibodies were detected  
418 simultaneously with goat anti-mouse IRDye-800CW (1:15,000, LI-COR Biosciences) and  
419 anti-rabbit IRDye-680CW (1:15,000, LI-COR Biosciences) or m-IgGκ BP-HRP (1:1000,  
420 Santa Cruz Biotech).

421

### 422 **HXK1 and SUC2 gene expression measurement**

423 The yeast cells (W303) were transformed with either *HXK1p-Citrine-ACT1t* or *SUC2p-*  
424 *Citrine-ACT1t*. The transformed cells were grown overnight on 3% ethanol as described  
425 above. The media in the cell was exchanged by centrifugation and adding new media with the  
426 required carbon-source concentration. After 2 hours, imaging was performed on a Leica  
427 DMi8 inverted fluorescence microscope (Leica microsystems). The microscope was  
428 equipped with a HCX PL APO 40 × /1.30 oil objective (Leica microsystems), Lumencor  
429 SOLA SE (Lumencor) led light and Leica DFC9000 GT sCMOS camera (Leica

430 microsystems). Citrine expression was observed with an excitation: 500/20, dichroic: 515 and  
431 emission: 535/30 filter cube at 150ms. Analysis of fluorescence intensity was performed with  
432 the ImageJ distribution FIJI.

433

## 434 Discussion

435

436 In this work, we studied the spatial distribution of Snf1 under different glucose concentrations  
437 and the kinetics of the nucleocytoplasmic shuttling by employing a FRAP method. We found  
438 that both the spatial distribution of Snf1 and the kinetics of the nucleocytoplasmic shuttling  
439 have a steady-state equilibrium that depends to a greater extent on the type of carbon source  
440 rather than on the concentration of glucose, which is in contrast to the Snf1 target, Mig1. Using  
441 non-linear mixed-effect regression, a negative correlation between Snf1 mobility and the  
442 kinetic constant of the nucleocytoplasmic, shuttling was observed within the conditions, while  
443 a positive trend was observed between different conditions. This indicates that two different  
444 mechanisms are at play, including at least one negative feedback loop. Further, we showed that  
445 Mig1 localization correlates with the Snf1 phosphorylation pattern and not with the Mig1  
446 phosphorylation pattern, suggesting that inactivation of Snf1 has a more pronounced effect on  
447 the localization of Mig1 than on the phosphorylation of Mig1. Previous studies showed a Snf1  
448 dependent and independent dephosphorylation of Mig1 (Wollman et al., 2017). Together, this  
449 indicates that nuclear localization and dephosphorylation of Mig1 is not exclusively triggered  
450 through phosphorylation by Snf1. Our time-lapse fluorescent microscopy shows that the  
451 intensity of Mig1 localization differs between the same concentration of different hexose  
452 sugars in the first 15 minutes after the upshift. Thus, the Snf1/Mig1 pathway seems to be more  
453 sensitive to glucose than to fructose and mannose.

454

455 Our main observation indicates that Snf1 is more sensitive to the presence of glucose rather  
456 than the concentration of glucose. This is in contrast to Mig1, which reacts strongly to the  
457 glucose concentrations. When we measured the steady-state NC ratio of Snf1 and Mig1 after  
458 shifting glucose grown cells to 2% glucose, 0.05% glucose and 2% glycerol, we observed that  
459 Mig1 had a large difference in NC ratio between the low and the high glucose concentrations,  
460 while the NC ratio in 0.05% glucose and 2% glycerol was similar. The NC ratio of Snf1 does  
461 not change significantly between the two glucose concentrations but is significant when  
462 comparing the glucose condition to the 2% glycerol, where we also observe a higher cell-to-  
463 cell variability. These data are consistent with previous time-lapse studies on Mig1 where in  
464 glucose grown cells shifted to 2% glucose, Mig1 stayed nuclear after 2h. In cells moved to a  
465 concentration below 0.2% glucose, Mig1 shifted to the cytosol and remained cytosolic after 2h  
466 (Bendrioua et al., 2014). This is also consistent with the data on expression from the promotor  
467 of the glucose repressed genes *HXK1* and *SUC2*, where we observed expression in 0.05%  
468 glucose but not in 4% glucose. In 0% glucose, we expect expression as in the 0.05% glucose  
469 case, but we observed an expression level similar as in 4% glucose, indicating glucose  
470 repression. This can either be caused by the lack of building blocks for YFP due to the  
471 prolonged glucose starvation or a second regulatory system, which, after the transcription  
472 repression, is needed to activate the expression of *HXK1* and *SUC2* promotor. Still, this  
473 indicates that glucose de-repression is starting already at 0.05% glucose where the bulk Mig1  
474 is located in the cytosol. Snf1 activity is necessary to mediate glucose de-repression, but  
475 interestingly Snf1 is showing a phosphorylation level at 0.05%, more similar to the levels at  
476 4% glucose, strengthening the argument that Snf1 is more sensitive to the presence of glucose  
477 while Mig1 reacts to the concentration of glucose. However, Snf1 has been shown to be  
478 transiently phosphorylated after a shift to lower glucose levels indicating that Snf1 is also



479 somehow sensing concentrations of glucose (Bendrioua et al., 2014). Furthermore, in the  
480 parameters fitted from the FRAP recovery curves, the two glucose conditions behave similarly,  
481 while the larger difference is between glucose and glycerol.

482  
483 We also observed that steady-state Mig1 localization could be correlated to glucose  
484 concentration. Moreover, we investigated the transient localization of Mig1 after a shift in  
485 glucose concentration. For glucose, we observed Mig1 localizing to the nucleus at 0.005%  
486 glucose, as reported previously (Bendrioua et al., 2014; Devit et al., 1997). For mannose and  
487 fructose, we observed Mig1 nuclear localization only at concentrations 0.05% and above. For  
488 all hexoses, the Mig1 nuclear intensity increased in a dose-dependent manner, however the rate  
489 of increase is hexose specific. It remains unclear whether this is caused due to a higher enzyme  
490 specificity to glucose or another reason.

491  
492 From the parameters inferred by the FRAP recovery curves, a negative correlation between  
493 mobility (parameter  $A1$ ) and the kinetic constant ( $\tau_{1}$ ) has been observed, indicating the  
494 existence of a negative feedback loop. Previous studies suggest the presence of a feedback loop  
495 where the concentration of Snf1 inhibit the phosphorylation status of Snf1, and the  
496 phosphorylation status is in turn regulating the levels of Snf1 (Hsu et al., 2015). Furthermore,  
497 taken in the context where Snf1 needs to be phosphorylated in order to accumulate in the  
498 nucleus (Hedbacker et al., 2004), this can potentially be the negative feedback loop we observe  
499 in the FRAP data. One straightforward interpretation is that cells subjected to the same carbon  
500 source and concentration but with a large fraction of the Snf1 pool bound to other processes  
501 need a higher activity of the nucleocytoplasmic shuttling to serve the same function. Previous  
502 studies suggest that the levels and the phosphorylation status of Snf1 are reciprocally regulated,  
503 as hyperphosphorylation has been observed when the levels of Snf1 is lower than normal (Hsu  
504 et al., 2015). This would fit with a model where nucleocytoplasmic shuttling is regulated by  
505 Snf1 phosphorylation status. A lower amount of mobile Snf1 would lead to a higher degree of  
506 phosphorylation in the available Snf1 and an increase in nucleocytoplasmic shuttling.

507  
508 This model would explain the negative feedback loop but not the positive trend between  
509 mobility and kinetics observed in this study when exposing the cells to different carbon sources  
510 or levels. The levels of Snf1 in cells grown in 2% glycerol compared to glucose grown cells  
511 are significantly lower. Both the levels and the fraction of phosphorylated Snf1 are similar in  
512 glucose grown cells, in contrast to glycerol grown cells, where higher phosphorylation in  
513 glycerol grown cells shows slower kinetics. Instead, other mechanisms might provide a better  
514 explanation. It is not known whether Snf1 mediates its own transport across the nuclear  
515 membrane. Nonetheless, it is suggested that Snf1 participates in the Mig1 repression complex  
516 but also that a fraction of Snf1 is present in the repression complex even at low glucose levels.  
517 The association of Snf1 to Mig1 repression complex is mediated through Hxk1 or Hxk2 and  
518 also contains Mig2, Reg1, Snf4 and Gal83 (Vega et al., 2016). However, this is not a 1:1 ratio  
519 as we see a large difference in nuclear intensity, and Mig1 operates in clusters (Wollman et al.,  
520 2017). Snf1 might also only participates in a fraction of the complexes formed by the Mig1  
521 clusters. Either way, it is possible that Snf1 is co-localizing with other components of this  
522 complex and that they are regulating the nucleoplasm shuttling in regard to levels of glucose  
523 and type of carbon source. This is supported by the fact that Mig1 localization is affected by  
524 *hxk1/2Δ* and that this effect is different depending on both carbon source and level (Schmidt et  
525 al., 2020). The low phosphorylation levels of Snf1 in 0.05% glucose, the expression of glucose  
526 repressed genes and the overall low signal of Snf1 that are relatively evenly distributed in the  
527 cell with a relative high cell-to-cell variability in all conditions suggests that the role of Snf1



528 in the nucleus can be carried out by few numbers of proteins and the variability does not  
529 contribute significantly to Snf1 ability to perform its nuclear or cytoplasmic function.

530

531 Overall, these results, together with previous studies, suggest a two-step process of the Snf1  
532 pathway that consists of localization and phosphorylation of the pathway components. One is  
533 phosphorylation-dependent and binary in its nature, the other is gradual and based on  
534 localization and mobility (Oh et al., 2020).

535

536 The Snf1/Mig1 pathway is immensely complex, and due to difficulties and lack of  
537 experimental methods for monitoring Snf1, the transcription factor Mig1 is often used as a  
538 readout. However, previous studies have pointed out that Mig1 is regulated both by a Snf1  
539 dependent and a Snf1 independent mechanism, making it hard to infer the mechanistic behavior  
540 of Snf1 by monitoring Mig1. With this study, we can confirm that many aspects of Snf1 and  
541 Mig1 behave differently and contribute to the demarcation of the responses. To further  
542 elucidate the dynamics and mechanism of the Snf1 pathway, the development of tools for  
543 monitoring Snf1, preferably in single cells in yeast, would be needed. For example, a method  
544 for monitoring phosphorylation levels without the risk of activating Snf1 or a method to  
545 investigate the complexes that Snf1 participates in during different conditions.

546

547 In this work, we employed non-linear mixed effect regression to analyze FRAP data, enabling  
548 inference of more information than using traditional regression methods. We show that a  
549 negative feedback loop controls Snf1 nucleocytoplasmic shuttling. Further, we hypothesize  
550 that part of the Snf1 pathway functions as a switch, in which Snf1 is dephosphorylated once  
551 glucose is taken up by the cell, and part of the pathway functions as a slider which the level of  
552 activation depends on the concentration of hexose sugars. This gives the Snf1-Mig1 system the  
553 flexibility and sensitivity to fine-tune itself dynamically to the metabolic state of the cell.

554

#### 555 **Funding:**

556 This work was supported by the Swedish Research Council (VR2016-03744 and VR2017-  
557 05117) and the Swedish Foundation for Strategic Research (FFL15-0238).

#### 558 **Acknowledgments:**

559 We acknowledge the Cvijovic group members for input and support along the way. We  
560 acknowledge the Centre for Cellular Imaging at the University of Gothenburg for giving us  
561 access to high-resolution techniques and excellent guidance in the world of imaging.

#### 562 **Conflict of Interest:**

563 None declared

564

#### 565 **References**

- 566 Almquist, J., Bendrioua, L., Adiels, C.B., Goksör, M., Hohmann, S., Jirstrand, M., 2015. A  
567 Nonlinear Mixed Effects Approach for Modeling the Cell-To-Cell Variability of  
568 Mig1 Dynamics in Yeast. PLOS ONE 10, e0124050.  
569 <https://doi.org/10.1371/journal.pone.0124050>
- 570 Bendrioua, L., Smedh, M., Almquist, J., Cvijovic, M., Jirstrand, M., Goksör, M., Adiels,  
571 C.B., Hohmann, S., 2014. Yeast AMP-activated Protein Kinase Monitors Glucose  
572 Concentration Changes and Absolute Glucose Levels. Journal of Biological  
573 Chemistry 289, 12863–12875. <https://doi.org/10.1074/jbc.m114.547976>

- 574 Berthels, N.J., Cordero Otero, R.R., Bauer, F.F., Pretorius, I.S., Thevelein, J.M., 2008.  
575 Correlation between glucose/fructose discrepancy and hexokinase kinetic properties  
576 in different *Saccharomyces cerevisiae* wine yeast strains. *Appl Microbiol Biotechnol*  
577 77, 1083–1091. <https://doi.org/10.1007/s00253-007-1231-2>
- 578 Carlson, M., Osmond, B.C., Botstein, D., 1981. MUTANTS OF YEAST DEFECTIVE IN  
579 SUCROSE UTILIZATION. *Genetics* 98, 25–40.  
580 <https://doi.org/10.1093/genetics/98.1.25>
- 581 Celenza, J.L., Eng, F.J., Carlson, M., 1989. Molecular analysis of the SNF4 gene of  
582 *Saccharomyces cerevisiae*: evidence for physical association of the SNF4 protein with  
583 the SNF1 protein kinase. *Molecular and Cellular Biology* 9, 5045–5054.  
584 <https://doi.org/10.1128/mcb.9.11.5045>
- 585 Chan, Y.-H.M., Marshall, W.F., 2014. Organelle Size Scaling of the Budding Yeast Vacuole  
586 Is Tuned by Membrane Trafficking Rates. *Biophys J* 106, 1986–1996.  
587 <https://doi.org/10.1016/j.bpj.2014.03.014>
- 588 Chandrashekarappa, D.G., McCartney, R.R., O'Donnell, A.F., Schmidt, M.C., 2016. The  $\beta$   
589 subunit of yeast AMP-activated protein kinase directs substrate specificity in response  
590 to alkaline stress. *Cellular Signalling* 28, 1881–1893.  
591 <https://doi.org/10.1016/j.cellsig.2016.08.016>
- 592 Chandrashekarappa, D.G., McCartney, R.R., Schmidt, M.C., 2013. Ligand Binding to the  
593 AMP-activated Protein Kinase Active Site Mediates Protection of the Activation  
594 Loop from Dephosphorylation\*. *Journal of Biological Chemistry* 288, 89–98.  
595 <https://doi.org/10.1074/jbc.M112.422659>
- 596 Daniel Gietz, R., Woods, R.A., 2002. Transformation of yeast by lithium acetate/single-  
597 stranded carrier DNA/polyethylene glycol method. *Guide to Yeast Genetics and*  
598 *Molecular and Cell Biology - Part B* 87–96. [https://doi.org/10.1016/s0076-](https://doi.org/10.1016/s0076-6879(02)50957-5)  
599 [6879\(02\)50957-5](https://doi.org/10.1016/s0076-6879(02)50957-5)
- 600 Davidian, M., Giltinan, D.M., 2003. Nonlinear models for repeated measurement data: An  
601 overview and update. *JABES* 8, 387–419. <https://doi.org/10.1198/1085711032697>
- 602 DeVit, M.J., Johnston, M., 1999. The nuclear exportin Msn5 is required for nuclear export of  
603 the Mig1 glucose repressor of *Saccharomyces cerevisiae*. *Current Biology* 9, 1231–  
604 1241. [https://doi.org/10.1016/s0960-9822\(99\)80503-x](https://doi.org/10.1016/s0960-9822(99)80503-x)
- 605 Devit, M.J., Waddle, J.A., Johnston, M., 1997. Regulated nuclear translocation of the Mig1  
606 glucose repressor. *Molecular Biology of the Cell* 8, 1603–1618.  
607 <https://doi.org/10.1091/mbc.8.8.1603>
- 608 Gancedo, J.M., 1998. Yeast carbon catabolite repression. *Microbiol Mol Biol Rev* 62, 334–  
609 361. <https://doi.org/10.1128/MMBR.62.2.334-361.1998>
- 610 García-Salcedo, R., Lubitz, T., Beltran, G., Elbing, K., Tian, Y., Frey, S., Wolkenhauer, O.,  
611 Krantz, M., Klipp, E., Hohmann, S., 2014. Glucose de-repression by yeast AMP-  
612 activated protein kinase SNF1 is controlled via at least two independent steps. *FEBS*  
613 *Journal* 281, 1901–1917. <https://doi.org/10.1111/febs.12753>
- 614 Hardie, D.G., 2014. AMPK—Sensing Energy while Talking to Other Signaling Pathways.  
615 *Cell Metabolism* 20, 939–952. <https://doi.org/10.1016/j.cmet.2014.09.013>
- 616 Hardie, D.G., Ross, F.A., Hawley, S.A., 2012. AMP-Activated Protein Kinase: A Target for  
617 Drugs both Ancient and Modern. *Chemistry & Biology* 19, 1222–1236.  
618 <https://doi.org/10.1016/j.chembiol.2012.08.019>
- 619 Hedbacker, K., Carlson, M., 2008. SNF1/AMPK pathways in yeast. *Frontiers in Bioscience*  
620 13, 2408. <https://doi.org/10.2741/2854>
- 621 Hedbacker, K., Hong, S.-P., Carlson, M., 2004. Pak1 Protein Kinase Regulates Activation  
622 and Nuclear Localization of Snf1-Gal83 Protein Kinase. *Molecular and Cellular*  
623 *Biology* 24, 8255–8263. <https://doi.org/10.1128/mcb.24.18.8255-8263.2004>

- 624 Hong, S.-P., Leiper, F.C., Woods, A., Carling, D., Carlson, M., 2003. Activation of yeast  
625 Snf1 and mammalian AMP-activated protein kinase by upstream kinases. *Proceedings*  
626 *of the National Academy of Sciences* 100, 8839–8843.  
627 <https://doi.org/10.1073/pnas.1533136100>
- 628 Hsu, H.E., Liu, T.N., Yeh, C.S., Chang, T.H., Lo, Y.C., Kao, C.F., 2015. Feedback control of  
629 Snf1 protein and its phosphorylation is necessary for adaptation to environmental  
630 stress. *Journal of Biological Chemistry* 290, 16786–16796.  
631 <https://doi.org/10.1074/jbc.M115.639443>
- 632 Jiang, R., Carlson, M., 1997. The Snf1 protein kinase and its activating subunit, Snf4, interact  
633 with distinct domains of the Sip1/Sip2/Gal83 component in the kinase complex.  
634 *Molecular and Cellular Biology* 17, 2099–2106.  
635 <https://doi.org/10.1128/mcb.17.4.2099>
- 636 Keleher, C.A., Redd, M.J., Schultz, J., Carlson, M., Johnson, A.D., 1992. Ssn6-Tup1 is a  
637 general repressor of transcription in yeast. *Cell* 68, 709–719.  
638 [https://doi.org/10.1016/0092-8674\(92\)90146-4](https://doi.org/10.1016/0092-8674(92)90146-4)
- 639 Kuhn, E., Lavielle, M., 2005. Maximum likelihood estimation in nonlinear mixed effects  
640 models. *Computational Statistics & Data Analysis* 49, 1020–1038.  
641 <https://doi.org/10.1016/j.csda.2004.07.002>
- 642 Lavielle, M., Mentré, F., 2007. Estimation of Population Pharmacokinetic Parameters of  
643 Saquinavir in HIV Patients with the MONOLIX Software. *J Pharmacokinet*  
644 *Pharmacodyn* 34, 229–249. <https://doi.org/10.1007/s10928-006-9043-z>
- 645 Llamosi, A., Gonzalez-Vargas, A.M., Versari, C., Cinquemani, E., Ferrari-Trecate, G.,  
646 Hersen, P., Batt, G., 2016. What Population Reveals about Individual Cell Identity:  
647 Single-Cell Parameter Estimation of Models of Gene Expression in Yeast. *PLOS*  
648 *Computational Biology* 12, e1004706. <https://doi.org/10.1371/journal.pcbi.1004706>
- 649 Lutfiyya, L.L., Iyer, V.R., DeRisi, J., DeVit, M.J., Brown, P.O., Johnston, M., 1998.  
650 Characterization of Three Related Glucose Repressors and Genes They Regulate in  
651 *Saccharomyces cerevisiae*. *Genetics* 150, 1377–1391.  
652 <https://doi.org/10.1093/genetics/150.4.1377>
- 653 Lutfiyya, L.L., Johnston, M., 1996. Two zinc-finger-containing repressors are responsible for  
654 glucose repression of SUC2 expression. *Molecular and Cellular Biology* 16, 4790–  
655 4797. <https://doi.org/10.1128/mcb.16.9.4790>
- 656 Mayer, C., Dimopoulos, S., Rudolf, F., Stelling, J., 2013. Using CellX to Quantify  
657 Intracellular Events, in: *Current Protocols in Molecular Biology*. John Wiley & Sons,  
658 Inc. <https://doi.org/10.1002/0471142727.mb1422s101>
- 659 Mayer, F.V., Heath, R., Underwood, E., Sanders, M.J., Carmena, D., McCartney, R.R.,  
660 Leiper, F.C., Xiao, B., Jing, C., Walker, P.A., Haire, L.F., Ogrodowicz, R., Martin,  
661 S.R., Schmidt, M.C., Gamblin, S.J., Carling, D., 2011. ADP Regulates SNF1, the  
662 *Saccharomyces cerevisiae* Homolog of AMP-Activated Protein Kinase. *Cell*  
663 *Metabolism* 14, 707–714. <https://doi.org/10.1016/j.cmet.2011.09.009>
- 664 McCartney, R.R., Schmidt, M.C., 2001. Regulation of Snf1 Kinase: ACTIVATION  
665 REQUIRES PHOSPHORYLATION OF THREONINE 210 BY AN UPSTREAM  
666 KINASE AS WELL AS A DISTINCT STEP MEDIATED BY THE Snf4  
667 SUBUNIT\*. *Journal of Biological Chemistry* 276, 36460–36466.  
668 <https://doi.org/10.1074/jbc.M104418200>
- 669 Nath, N., McCartney, R.R., Schmidt, M.C., 2003. Yeast Pak1 Kinase Associates with and  
670 Activates Snf1. *Molecular and Cellular Biology* 23, 3909–3917.  
671 <https://doi.org/10.1128/mcb.23.11.3909-3917.2003>
- 672 Oh, S., Lee, J., Swanson, S.K., Florens, L., Washburn, M.P., Workman, J.L., 2020. Yeast  
673 Nuak1 phosphorylates histone H3 threonine 11 in low glucose stress by the

- 674 cooperation of AMPK and CK2 signaling. *eLife* 9, e64588.  
675 <https://doi.org/10.7554/eLife.64588>
- 676 Ostling, J., Ronne, H., 1998. Negative control of the Mig1p repressor by Snf1p-dependent  
677 phosphorylation in the absence of glucose. *European Journal of Biochemistry* 252,  
678 162–168. <https://doi.org/10.1046/j.1432-1327.1998.2520162.x>
- 679 Persson, S., Welkenhuysen, N., Shashkova, S., Cvijovic, M., 2020. Fine-Tuning of Energy  
680 Levels Regulates SUC2 via a SNF1-Dependent Feedback Loop. *Front. Physiol.* 11.  
681 <https://doi.org/10.3389/fphys.2020.00954>
- 682 Ricicova, M., Hamidi, M., Quiring, A., Niemisto, A., Emberly, E., Hansen, C.L., 2013.  
683 Dissecting genealogy and cell cycle as sources of cell-to-cell variability in MAPK  
684 signaling using high-throughput lineage tracking. *Proceedings of the National*  
685 *Academy of Sciences* 110, 11403–11408. <https://doi.org/10.1073/pnas.1215850110>
- 686 RStudio Team, 2020. RStudio: Integrated Development Environment for R. RStudio, PBC.,  
687 Boston, MA.
- 688 Ruiz, A., Xu, X., Carlson, M., 2013. Ptc1 Protein Phosphatase 2C Contributes to Glucose  
689 Regulation of SNF1/AMP-activated Protein Kinase (AMPK) in *Saccharomyces*  
690 *cerevisiae*. *Journal of Biological Chemistry* 288, 31052–31058.  
691 <https://doi.org/10.1074/jbc.m113.503763>
- 692 Ruiz, A., Xu, X., Carlson, M., 2011. Roles of two protein phosphatases, Reg1-Glc7 and Sit4,  
693 and glycogen synthesis in regulation of SNF1 protein kinase. *Proceedings of the*  
694 *National Academy of Sciences* 108, 6349–6354.  
695 <https://doi.org/10.1073/pnas.1102758108>
- 696 Schindelin, J., Arganda-Carreras, I., Frise, E., Kaynig, V., Longair, M., Pietzsch, T.,  
697 Preibisch, S., Rueden, C., Saalfeld, S., Schmid, B., Tinevez, J.-Y., White, D.J.,  
698 Hartenstein, V., Eliceiri, K., Tomancak, P., Cardona, A., 2012. Fiji: an open-source  
699 platform for biological-image analysis. *Nat Methods* 9, 676–682.  
700 <https://doi.org/10.1038/nmeth.2019>
- 701 Schmidt, G.W., Welkenhuysen, N., Ye, T., Cvijovic, M., Hohmann, S., 2020. Mig1  
702 localization exhibits biphasic behavior which is controlled by both metabolic and  
703 regulatory roles of the sugar kinases. *Molecular Genetics and Genomics* 295, 1489–  
704 1500. <https://doi.org/10.1007/s00438-020-01715-4>
- 705 Schmidt, M.C., McCartney, R.R., 2000. beta-subunits of Snf1 kinase are required for kinase  
706 function and substrate definition. *The EMBO Journal* 19, 4936–4943.  
707 <https://doi.org/10.1093/emboj/19.18.4936>
- 708 Sissoko, D., Laouenan, C., Folkesson, E., M'Lebing, A.-B., Beavogui, A.-H., Baize, S.,  
709 Camara, A.-M., Maes, P., Shepherd, S., Danel, C., Carazo, S., Conde, M.N., Gala, J.-  
710 L., Colin, G., Savini, H., Bore, J.A., Marcis, F.L., Koundouno, Fara Raymond,  
711 Petitjean, F., Lamah, M.-C., Diederich, S., Tounkara, A., Poelart, G., Berbain, E.,  
712 Dindart, J.-M., Duraffour, S., Lefevre, A., Leno, T., Peyrouset, O., Irengue, L.,  
713 Bangoura, N., Palich, R., Hinzmann, J., Kraus, A., Barry, T.S., Berette, S., Bongono,  
714 A., Camara, M.S., Munoz, V.C., Doumbouya, L., Harouna, S., Kighoma, P.M.,  
715 Koundouno, Fara Roger, Lolamou, R., Loua, C.M., Massala, V., Moumouni, K.,  
716 Provost, C., Samake, N., Sekou, C., Soumah, A., Arnould, I., Komano, M.S., Gustin,  
717 L., Berutto, C., Camara, D., Camara, F.S., Colpaert, J., Delamou, L., Jansson, L.,  
718 Kourouma, E., Loua, M., Malme, K., Manfrin, E., Maomou, A., Milinouno, A.,  
719 Ombelet, S., Sidiboun, A.Y., Verreckt, I., Yombouno, P., Bocquin, A., Carbonnelle,  
720 C., Carmoi, T., Frange, P., Mely, S., Nguyen, V.-K., Pannetier, D., Taburet, A.-M.,  
721 Treluyer, J.-M., Kolie, J., Moh, R., Gonzalez, M.C., Kuisma, E., Liedigk, B., Ngabo,  
722 D., Rudolf, M., Thom, R., Kerber, R., Gabriel, M., Caro, A.D., Wölfel, R., Badir, J.,  
723 Bentahir, M., Deccache, Y., Dumont, C., Durant, J.-F., Bakkouri, K.E., Uwamahoro,



- 724 M.G., Smits, B., Toufik, N., Cauwenberghe, S.V., Ezzedine, K., Dortenzio, E.,  
725 Pizarro, L., Etienne, A., Guedj, J., Fizet, A., Fare, E.B. de S., Murgue, B., Tran-Minh,  
726 T., Rapp, C., Piguet, P., Poncin, M., Draguez, B., Duverger, T.A., Barbe, S., Baret,  
727 G., Defourny, I., Carroll, M., Raoul, H., Augier, A., Eholie, S.P., Yazdanpanah, Y.,  
728 Levy-Marchal, C., Antierrens, A., Herp, M.V., Günther, S., Lamballerie, X. de, Keita,  
729 S., Mentre, F., Anglaret, X., Malvy, D., Group, J.S., 2016. Experimental Treatment  
730 with Favipiravir for Ebola Virus Disease (the JIKI Trial): A Historically Controlled,  
731 Single-Arm Proof-of-Concept Trial in Guinea. *PLOS Medicine* 13, e1001967.  
732 <https://doi.org/10.1371/journal.pmed.1001967>
- 733 Treitel, M.A., Carlson, M., 1995. Repression by SSN6-TUP1 is directed by MIG1, a  
734 repressor/activator protein. *Proceedings of the National Academy of Sciences* 92,  
735 3132–3136. <https://doi.org/10.1073/pnas.92.8.3132>
- 736 Treitel, M.A., Kuchin, S., Carlson, M., 1998. Snf1 Protein Kinase Regulates Phosphorylation  
737 of the Mig1 Repressor in *Saccharomyces cerevisiae*. *Molecular and Cellular Biology*  
738 18, 6273–6280. <https://doi.org/10.1128/mcb.18.11.6273>
- 739 Usaite, R., Jewett, M.C., Oliveira, A.P., Yates, J.R., Olsson, L., Nielsen, J., 2009.  
740 Reconstruction of the yeast Snf1 kinase regulatory network reveals its role as a global  
741 energy regulator. *Molecular Systems Biology* 5, 319.  
742 <https://doi.org/10.1038/msb.2009.67>
- 743 Vega, M., Riera, A., Fernández-Cid, A., Herrero, P., Moreno, F., 2016. Hexokinase 2 Is an  
744 Intracellular Glucose Sensor of Yeast Cells That Maintains the Structure and Activity  
745 of Mig1 Protein Repressor Complex \*. <https://doi.org/10.1074/jbc.M115.711408>
- 746 Vincent, O., Townley, R., Kuchin, S., Carlson, M., 2001. Subcellular localization of the Snf1  
747 kinase is regulated by specific beta subunits and a novel glucose signaling  
748 mechanism. *Genes & development* 15, 1104–14. <https://doi.org/10.1101/gad.879301>
- 749 Welkenhuysen, N., Borgqvist, J., Backman, M., Bendrioua, L., Goksör, M., Adiels, C.B.,  
750 Cvijovic, M., Hohmann, S., 2017. Single-cell study links metabolism with nutrient  
751 signaling and reveals sources of variability. *BMC Systems Biology* 11.  
752 <https://doi.org/10.1186/s12918-017-0435-z>
- 753 Wollman, A.J.M., Shashkova, S., Hedlund, E.G., Friemann, R., Hohmann, S., Leake, M.C.,  
754 2017. Transcription factor clusters regulate genes in eukaryotic cells. *eLife* 6.  
755 <https://doi.org/10.7554/eLife.27451>
- 756 Ye, T., Elbing, K., Hohmann, S., 2008. The pathway by which the yeast protein kinase Snf1p  
757 controls acquisition of sodium tolerance is different from that mediating glucose  
758 regulation. *Microbiology* 154, 2814–2826.  
759 <https://doi.org/10.1099/mic.0.2008/020149-0>
- 760 Zhang, J., Olsson, L., Nielsen, J., 2010. The  $\beta$ -subunits of the Snf1 kinase in *Saccharomyces*  
761 *cerevisiae*, Gal83 and Sip2, but not Sip1, are redundant in glucose derepression and  
762 regulation of sterol biosynthesis. *Molecular Microbiology* 77, 371–383.  
763 <https://doi.org/10.1111/j.1365-2958.2010.07209.x>
- 764 Zhang, Y., McCartney, R.R., Chandrashekarappa, D.G., Mangat, S., Schmidt, M.C., 2011.  
765 Reg1 protein regulates phosphorylation of all three Snf1 isoforms but preferentially  
766 associates with the Gal83 isoform. *Eukaryot Cell* 10, 1628–1636.  
767 <https://doi.org/10.1128/EC.05176-11>

768  
769
